# Supplementary material for: Disruption of CXCR6 Ameliorates Kidney Inflammation and Fibrosis in Deoxycorticosterone Acetate/Salt Hypertension
Source: PubMed Central journal article supplement (PMC6954216; doi:10.1038/s41598-019-56933-7), 2020-01-10
Supplement: 41598_2019_56933_MOESM1_ESM.pdf [file 41598_2019_56933_MOESM1_ESM.pdf]

1           **Disruption of CXCR6 Ameliorates Kidney Inflammation and Fibrosis in**  
2                           **Deoxycorticosterone Acetate/Salt Hypertension**

3                                           **Supplemental Material**

4 Yuanbo Wu<sup>1,2</sup>, Changlong An<sup>3</sup>, Xiaogao Jin<sup>1</sup>, Zhaoyong Hu<sup>1</sup>, and Yanlin Wang<sup>1,3,4,5,6\*</sup>

5 <sup>1</sup> Section of Nephrology, Department of Medicine, Baylor College of Medicine,  
6 Houston, Texas, USA

7 <sup>2</sup> Department of Anesthesiology, Hubei Cancer Hospital, Hubei, Wuhan, China

8 <sup>3</sup> Division of Nephrology, Department of Medicine, University of Connecticut School of  
9 Medicine, Farmington, Connecticut, USA

10 <sup>4</sup> Department of Cell Biology, University of Connecticut School of Medicine,  
11 Farmington, Connecticut, USA

12 <sup>5</sup> Institute for Systems Genomics, University of Connecticut School of Medicine,  
13 Farmington, Connecticut, USA

14 <sup>6</sup> Renal Section, Veterans Affairs Connecticut Healthcare System, West Haven,  
15 Connecticut, USA

16 Running Title: CXCR6 in deoxycorticosterone acetate/salt hypertension

17 \*Corresponding author:

18 Yanlin Wang, MD, PhD

19 Division of Nephrology/Department of Medicine

20 University of Connecticut School of Medicine

21 263 Farmington Avenue

22 Farmington, CT 06030-1405

23 Email: [yanlwang@uchc.edu](mailto:yanlwang@uchc.edu)

24

25 **Figure S1. Disruption of CXCR6 reduces  $\alpha$ -SMA protein expression in the kidney.**

26 **A.** Representative Western blots show the protein levels of  $\alpha$ -SMA in the kidneys of  
27 WT and CXCR6 KO mice 4 weeks after DOCA/salt or vehicle treatment. **B.**  
28 Quantitative Western blot analysis of  $\alpha$ -SMA protein levels in the kidneys. \*\*  $P < 0.01$   
29 vs WT controls, +  $P < 0.05$  vs KO-DOCA, and #  $P < 0.05$  vs WT-DOCA. n=6 per group.  
30

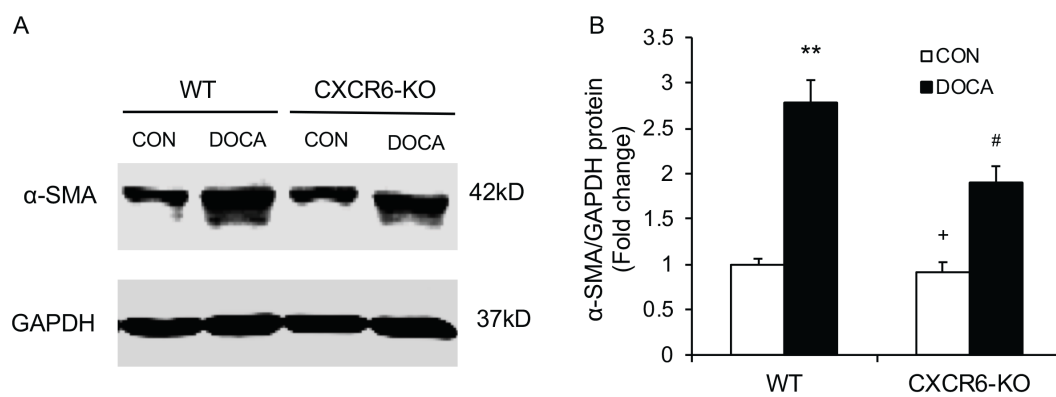

31

32

33
